# Supplementary material for: Isotopomer labeling and oxygen dependence of hybrid nitrous oxide production
Source: Copernicus journal article supplement (doi:10.5194/bg-21-3215-2024), 2024-07-17
Supplement: Supplementary file 1 [file bg-21-3215-2024-supplement.zip]

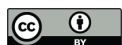

## *Supplement of*

# **Isotopomer labeling and oxygen dependence of hybrid nitrous oxide production**

**Colette L. Kelly et al.**

*Correspondence to:* Colette L. Kelly (colette.kelly@whoi.edu)

- bg-21-3215-2024-supplement-title-page.pdf
- Table S1.xlsx
- Table S2.xlsx
- Table S3.xlsx
- Table S4.xlsx
- plot\_data.xlsx
- supplementary figures.pdf

The copyright of individual parts of the supplement might differ from the article licence.
