# Supplementary material for: Isotopomer labeling and oxygen dependence of hybrid nitrous oxide production
Source: Copernicus journal article supplement (doi:10.5194/bg-21-3215-2024), 2024-07-17
Supplement: Supplementary file 2 [file bg-21-3215-2024-supplement.zip]

Supplementary figures for

## Isotopomer labeling and oxygen dependence of hybrid nitrous oxide production

5 Colette L. Kelly,<sup>1,2\*</sup> Nicole M. Travis,<sup>1</sup> Pascale Anabelle Baya,<sup>1</sup> Claudia Frey,<sup>3</sup> Xin Sun,<sup>4</sup> Bess B. Ward,<sup>5</sup> and Karen L. Casciotti<sup>1</sup>

<sup>1</sup>Department of Earth System Science, Stanford University, Stanford, CA 94305, U.S.A.

<sup>2</sup>Department of Marine Chemistry and Geochemistry, Woods Hole Oceanographic Institution, Woods Hole, MA 02543, U.S.A.

<sup>3</sup>Department of Environmental Science, University of Basel, Basel, Switzerland

10 <sup>4</sup>Department of Global Ecology, Carnegie Institution for Science, Stanford, CA 94305, U.S.A.

<sup>5</sup>Department of Geosciences, Princeton University, Princeton, NJ 08544, U.S.A.

*Correspondence to:* Colette L. Kelly (email: [colette.kelly@whoi.edu](mailto:colette.kelly@whoi.edu)).

**Contents of this file: Figures S1-S10**

*Tables S1-S4 included separately as excel files in this .zip archive.*

15

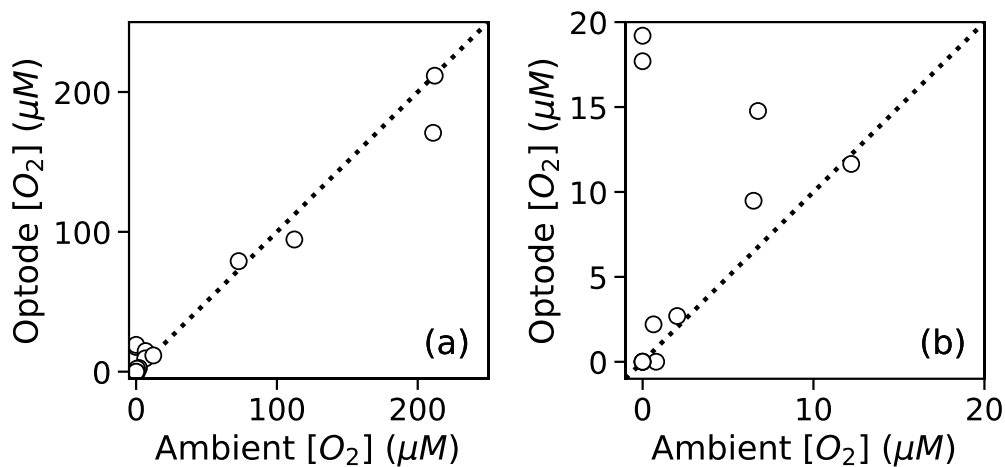

Figure S1.  $[O_2]$  measured by chemiluminescent optodes mounted inside sample bottles vs. ambient  $[O_2]$  measured by a Seabird sensor for the bottles from which samples were taken. Data (circles) are plotted along the full range of  $[O_2]$  (a) and zoomed in to 0-20  $\mu M$   $[O_2]$  (b). The dashed line in each plot is the 1:1 line. High values of optode  $[O_2]$  at 0 ambient  $[O_2]$  correspond to the two experiments at anoxic depths at station PS2 that were not purged before tracer addition.

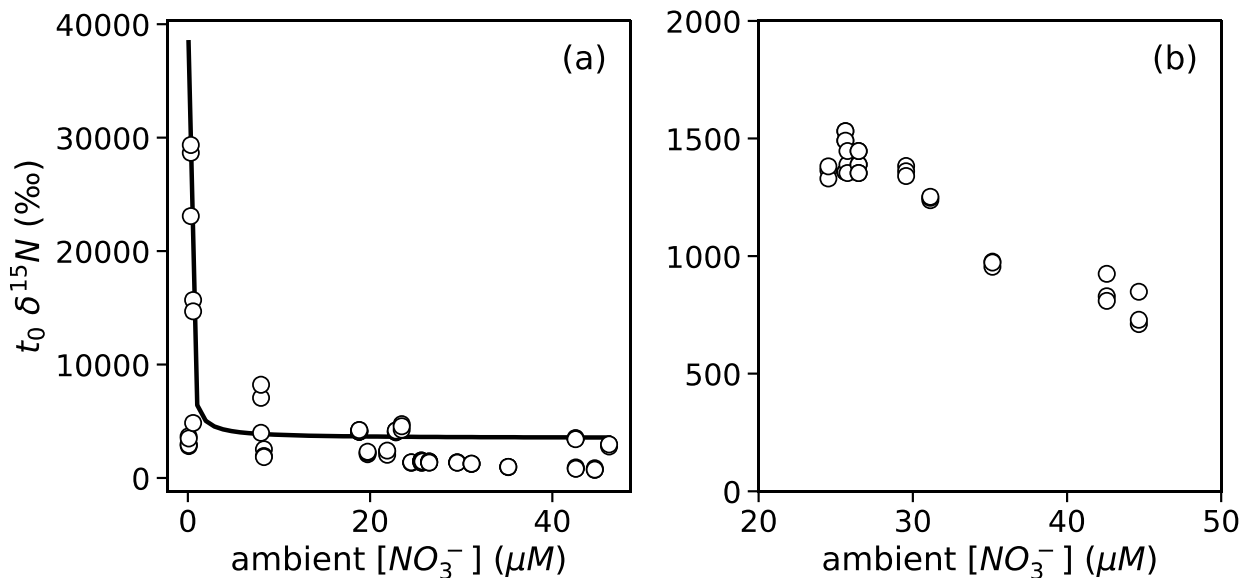

Figure S2.  $\delta^{15}N-NO_3^-$  at  $t_0$  vs. ambient  $[NO_3^-]$  in  $^{15}N-NO_2^-$  experiments across the full range of ambient  $[NO_3^-]$  (a) and from 20-50  $\mu M$   $[NO_3^-]$  (b).

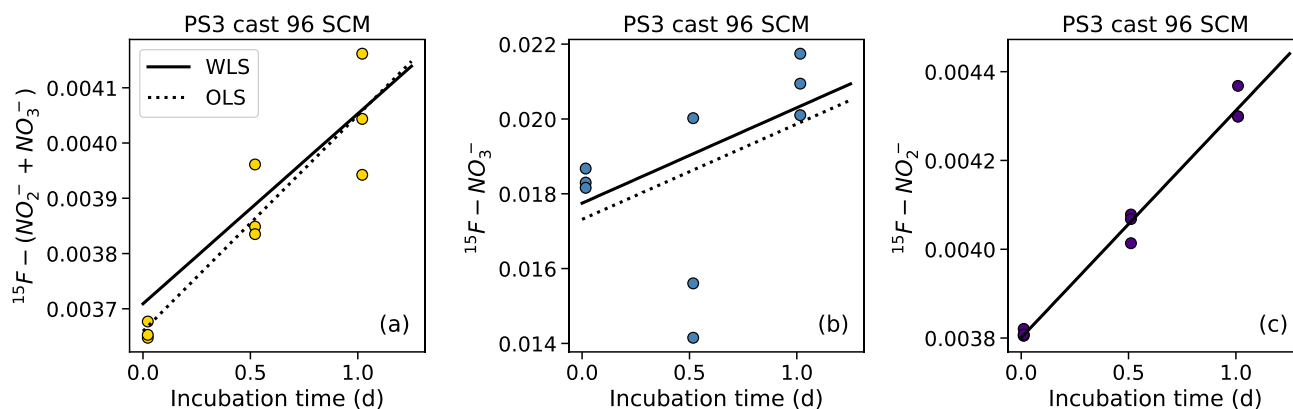

**Figure S3.** Example  $^{15}N$  time course for the  $^{15}N-NH_4^+$  incubation experiment (a, yellow),  $^{15}N-NO_2^-$  incubation experiment (b, blue), and  $^{15}N-NO_3^-$  incubation experiment (c, indigo) in the secondary chlorophyll maximum at station PS3. Rates are calculated from the slope of the production atom fraction vs. incubation time. When production atom fraction was calculated with the denitrifier method ( $^{15}N-NH_4^+$  and  $^{15}N-NO_2^-$  experiments), slopes were calculated with a weighted least squares linear regression, weighting each point by its uncertainty. Weighted least squares (dashed line) and ordinary least squares (solid line) slopes are shown in each plot.

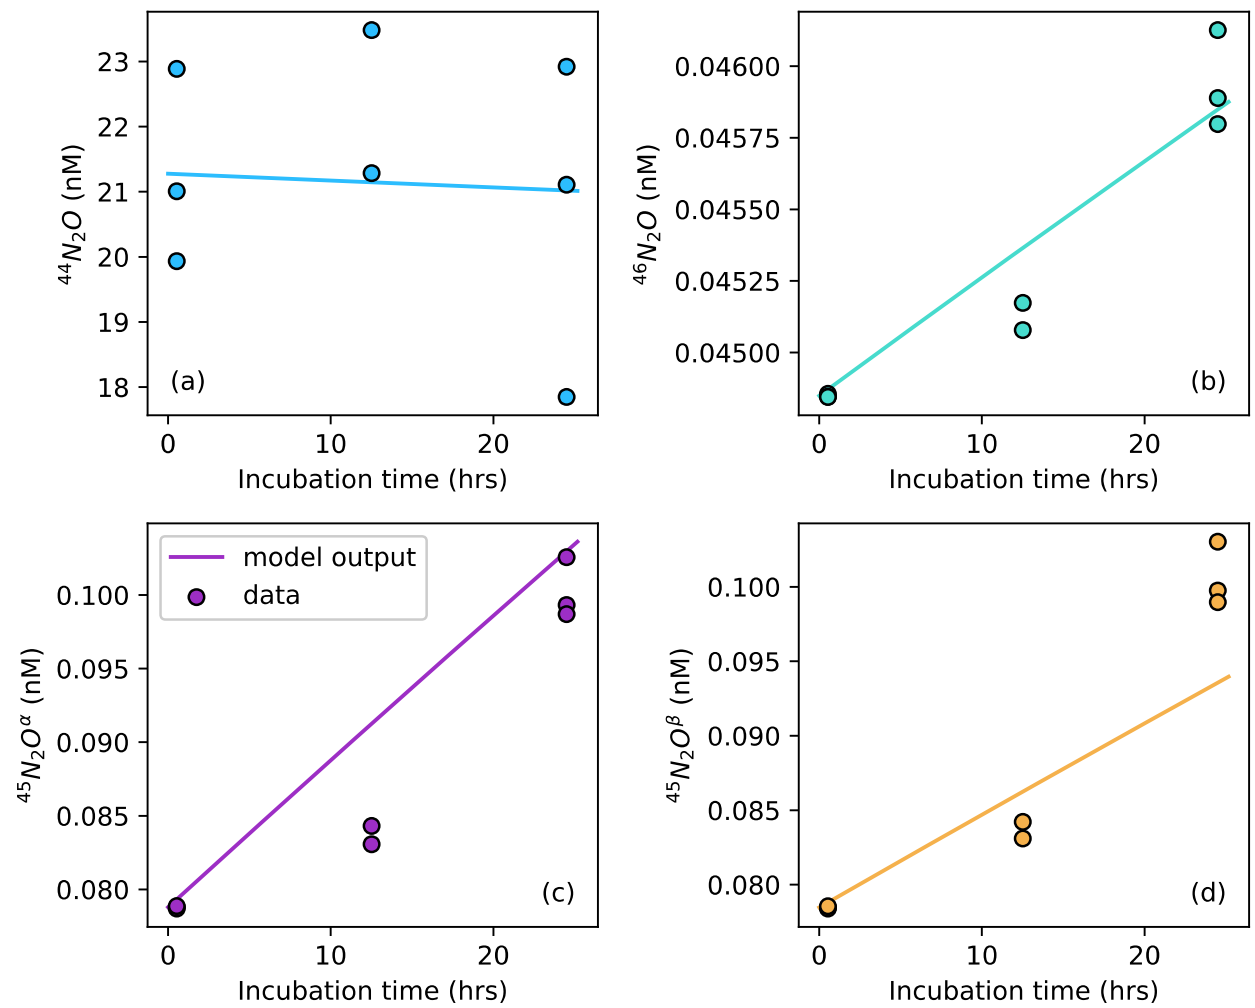

**Figure S4. Example time-dependent numerical model fit through  $N_2O$  isotopocule data for the  $^{15}N-NH_4^+$  experiment in the secondary chlorophyll maximum at station PS3. Model output (solid lines) is optimized against the observed  $^{44}N_2O$  (a),  $^{46}N_2O$  (b),  $^{45}N_2O^\alpha$  (c), and  $^{45}N_2O^\beta$  (d) at each timepoint in each tracer experiment.**

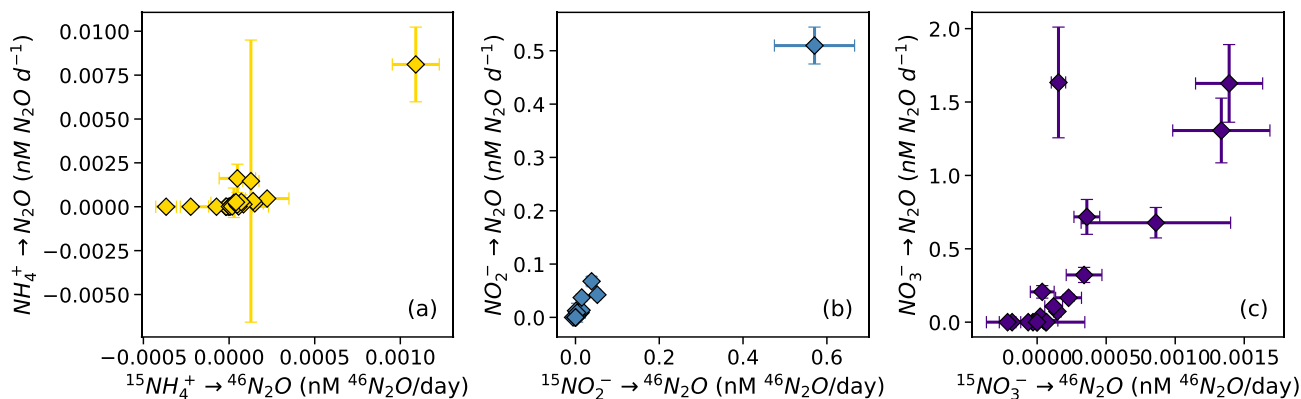

Figure S5. Modeled  $\text{N}_2\text{O}$  production processes are plotted against net  $^{46}\text{N}_2\text{O}$  production to ground-truth the forward-running model. Total  $\text{N}_2\text{O}$  production from solely  $\text{NH}_4^+$  is plotted against net  $^{46}\text{N}_2\text{O}$  production from  $^{15}\text{N}\text{-NH}_4^+$  (a, yellow); modeled  $\text{N}_2\text{O}$  production from  $\text{NO}_2^-$  via denitrification is plotted against net  $^{46}\text{N}_2\text{O}$  production from  $^{15}\text{N}\text{-NO}_2^-$  (b, blue); and modeled  $\text{N}_2\text{O}$  production from  $\text{NO}_3^-$  via denitrification is plotted against net  $^{46}\text{N}_2\text{O}$  production from  $^{15}\text{N}\text{-NO}_3^-$  (c, indigo) at all stations and depths. The y-axes achieve greater rates than the x-axes because the y-axes represent the total  $\text{N}_2\text{O}$  production from a given process ( $^{44}\text{N}_2\text{O} + ^{45}\text{N}_2\text{O} + ^{46}\text{N}_2\text{O}$ ), while the x-axes represent only the net production of  $^{46}\text{N}_2\text{O}$  from a given  $^{15}\text{N}$ -labeled substrate. Since the model cannot produce negative rates, negative net rates of net  $^{46}\text{N}_2\text{O}$  production correspond to modeled  $\text{N}_2\text{O}$  production rates of zero.

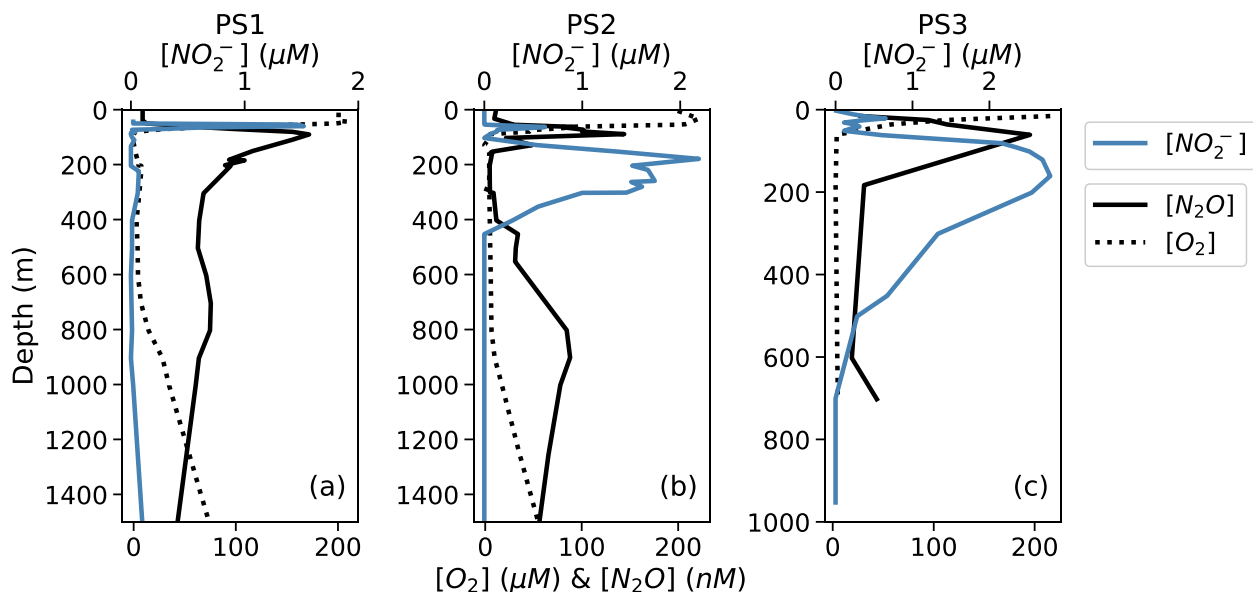

Figure S6. Dissolved  $[\text{O}_2]$  (dashed black lines),  $[\text{N}_2\text{O}]$  (solid black lines), and  $[\text{NO}_2^-]$  (solid blue lines) at station PS1 (a), PS2 (b), and PS3 (c). Data from Kelly et al., 2021.

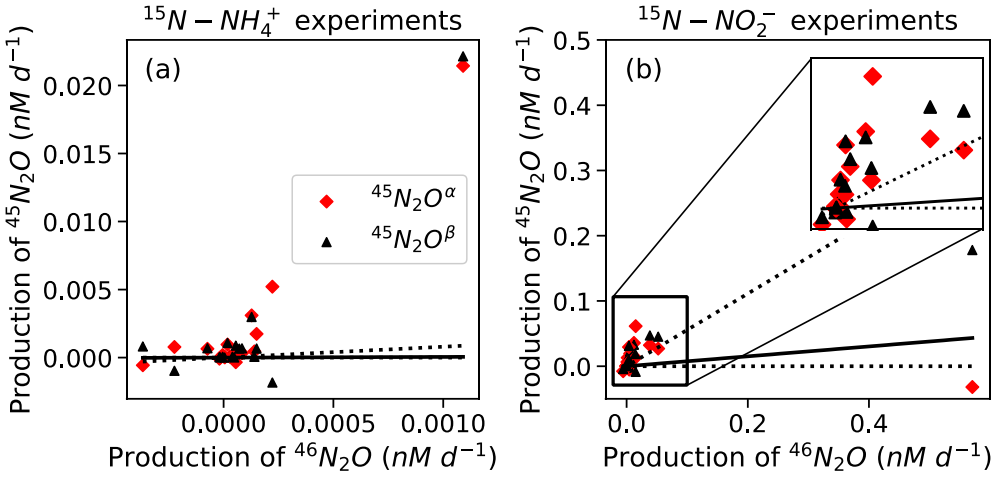

60 **Figure S7.** Net production of  $^{45}\text{N}_2\text{O}\alpha$  (red diamonds) and  $^{45}\text{N}_2\text{O}\beta$  (black triangles) vs.  $^{46}\text{N}_2\text{O}$  from  $^{15}\text{N} - \text{NH}_4^+$  (a) and  $^{15}\text{N} - \text{NO}_2^-$  (b). The insert in (b) shows a zoomed-in view of the data. The solid black lines indicate the expected production  $^{45}\text{N}_2\text{O}\alpha$  and  $^{45}\text{N}_2\text{O}\beta$  from a process drawing both N atoms in  $\text{N}_2\text{O}$  from the same substrate pool, based on the atom fraction of the labeled substrate ( $\text{NH}_4^+$  or  $\text{NO}_2^-$ ) and a binomial distribution of  $\text{N}_2\text{O}$  isotopocules. Dashed lines indicate the range of expected values, based on the range of atom fractions in each experiment. Production of  $^{45}\text{N}_2\text{O}\alpha$  and  $^{45}\text{N}_2\text{O}\beta$  above this expected production indicate the presence of a hybrid process.

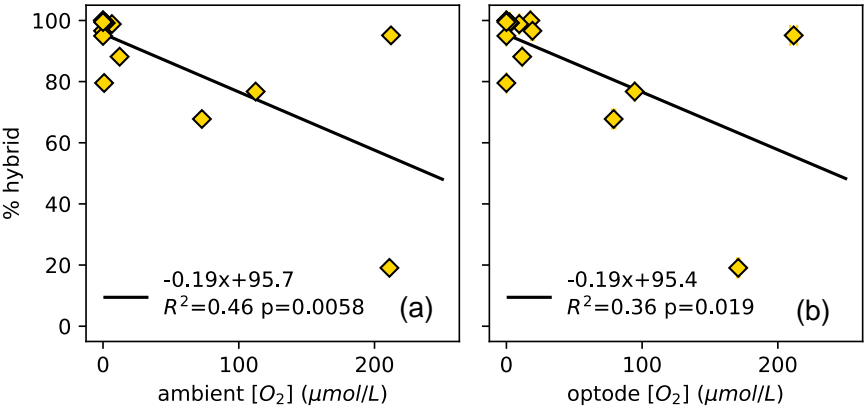

65 **Figure S8.** Hybrid production as a percentage of  $\text{N}_2\text{O}$  production from  $\text{NH}_4^+$  along a range of ambient  $[\text{O}_2]$  measured by a Seabird sensor for the Niskin bottles from which samples were taken (a) and  $[\text{O}_2]$  measured by chemiluminescent optodes mounted inside sample bottles (b). Slope, intercept,  $R^2$ , and p-values are displayed on each plot for the ordinary least squares regression through the data.

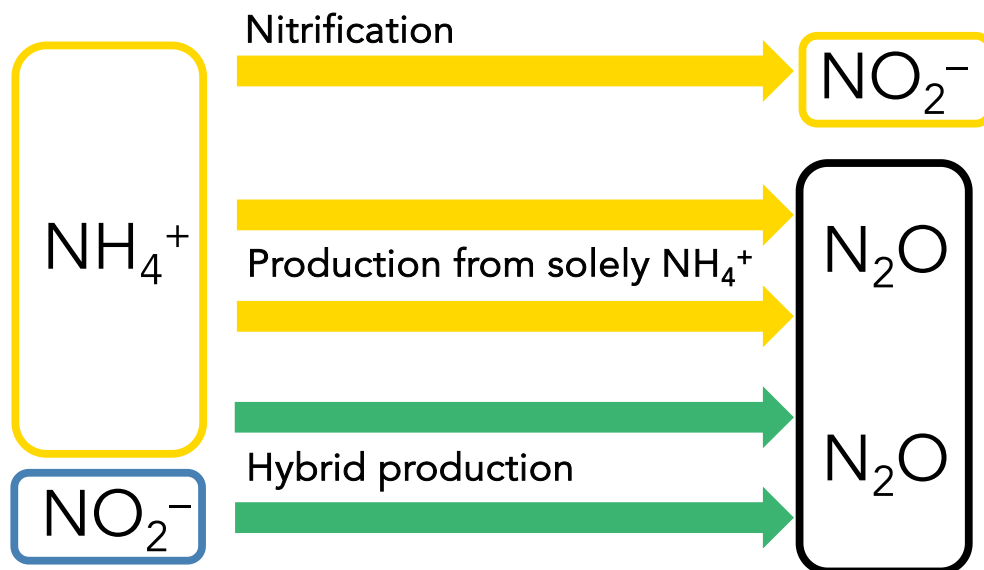

Figure S9. To ensure mass balance in terms of  $\text{NH}_4^+$  consumption,  $\text{N}_2\text{O}$  yield (%) during production from  $\text{NH}_4^+$  is calculated as  $\{2 * (\text{N}_2\text{O production from } \text{NH}_4^+, \text{ nM } \text{N}_2\text{O /day}) / [2 * (\text{N}_2\text{O production from } \text{NH}_4^+, \text{ nM } \text{N}_2\text{O /day}) + \text{hybrid } \text{N}_2\text{O production, nM } \text{N}_2\text{O /day} + \text{NH}_3 \text{ oxidation, nM N/day}]\} * 100$ .  $\text{N}_2\text{O}$  yield (%) during hybrid production is calculated as  $\{\text{hybrid } \text{N}_2\text{O production, nM } \text{N}_2\text{O /day} / [2 * (\text{N}_2\text{O production from } \text{NH}_4^+, \text{ nM } \text{N}_2\text{O /day}) + \text{hybrid } \text{N}_2\text{O production, nM } \text{N}_2\text{O /day} + \text{NH}_3 \text{ oxidation, nM N/day}]\} * 100$ .

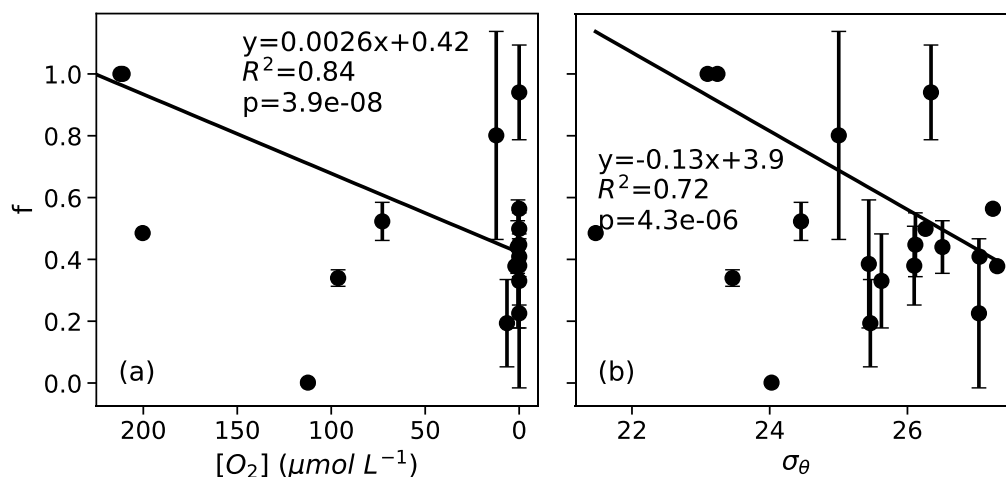

Figure S10. Weighted least squares regressions of  $f$  against ambient  $[\text{O}_2]$  (a) and potential density  $\sigma_\theta$  (b). Slope, intercept,  $R^2$ , and  $p$ -values are displayed on each plot for the weighted least squares regression through the data. The value of  $f$  indicates the proportion of each N atom in  $\text{N}_2\text{O}$  derived from  $\text{NH}_4^+$  and  $\text{NO}_2^-$  during hybrid  $\text{N}_2\text{O}$  production; as approaches 1, more of  $\text{N}^\alpha$  is derived from  $\text{NO}_2^-$ . Separation of  $^{45}\text{N}_2\text{O}^\alpha$  and  $^{45}\text{N}_2\text{O}^\beta$  production indicate values of  $f$  less than or greater than  $1/2$ .
